# Supplementary material for: Asymmetry in three-site relaxation exchange NMR
Source: Copernicus journal article supplement (doi:10.5194/mr-4-217-2023), 2023-08-24
Supplement: Supplementary file [file mr-4-217-2023-supplement.pdf]

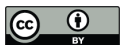

*Supplement of*

## **Asymmetry in three-site relaxation exchange NMR**

**Bernhard Blümich et al.**

*Correspondence to:* Bernhard Blümich (bluemich@itmc.rwth-aachen.de)

The copyright of individual parts of the supplement might differ from the article licence.

## 1 Neighborhoods explored in 2D vacancy-diffusion simulations

2

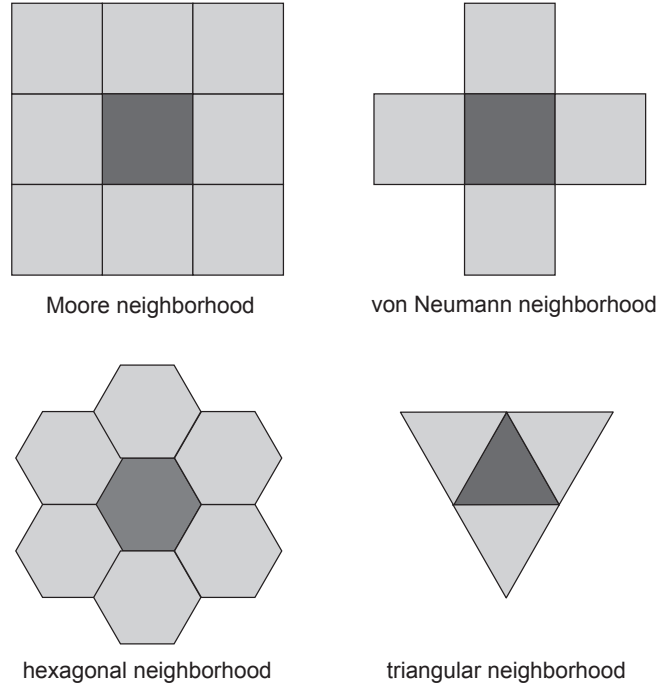

3

4 Figure S1. Simulation neighborhoods (grids) of range 1 for jumps from the center  
 5 position (dark grey) to neighbor positions (light grey). All three asymmetry parameters  
 6 from Eqn. (4) were calculated at each simulation run. Only the vacancy-diffusion  
 7 simulations produced with the Moore neighborhood obeyed Eqn. (4), while all gas-  
 8 diffusion simulations did.

9

## 10 Empirical Ansatz for the estimation of the transition probability from $\Delta U$ and $\Delta S$

11 In an effort to introduce interactions between a particle and its surroundings, a quantity  
 12 reminiscent of the free energy change  $\Delta A = \Delta U - T \Delta S$  is determined from crude  
 13 models of the internal energy change  $\Delta U = -\mathbf{F} \Delta \mathbf{R}$  defined by the net force  $\mathbf{F}$  exerted  
 14 from all neighboring particles on the particle at stake and the length  $|\Delta \mathbf{R}|$  of the jump  
 15 to the next cell, the temperature  $T$ , and the entropy change  $\Delta S$ . The force  $\mathbf{F}$  between  
 16 two particles follows Newton's inverse square distance law. It is proportional to  $\frac{1}{|\Delta \mathbf{R}|^2}$  in  
 17 the direction of  $\frac{1}{|\Delta \mathbf{R}|} \Delta \mathbf{R}$  from an occupied cell  $j$  to the particle  $i$  under consideration. The  
 18 total force the particle  $i$  experiences is estimated from the vector sum of the forces  
 19 exerted from the particles  $j$  in all occupied neighbor cells (Fig. 2a),

$$20 \quad \mathbf{F}_i = \sum_j \frac{1}{|\Delta \mathbf{R}_{j,i}|^3} \Delta \mathbf{R}_{j,i}. \quad (1)$$

21 The internal energy change  $\Delta U_{f,i} = -(\mathbf{F}_f - \mathbf{F}_i) \Delta \mathbf{R}_{f,i} \approx \mathbf{F}_i \Delta \mathbf{R}_{f,i}$  is modeled for each  
 22 potential jump from the initial, occupied cell  $i$  to the final, empty cell  $f$  by the product

23 of the net force  $\mathbf{F}_i$  with the vector  $\Delta\mathbf{R}_{f,i}$  connecting the centers of the initial cell  $i$  and  
 24 the final cell  $f$ .

25 The entropy change  $\Delta S = S_f - S_i$  is the difference between the entropies of the  
 26 particle with its eight nearest neighbors for the final state  $f$  and the initial state  $i$ . It is  
 27 modeled by the sum of the step lengths  $R_{f,i} = |\Delta\mathbf{R}_{f,i}|$  of the particle  $i$  to its unoccupied  
 28 next nearest neighbor cells  $f$ ,

$$29 \quad S_i = \sum_f \Delta R_{f,i}. \quad (2)$$

30 In case a neighbor cell is occupied,  $\Delta\mathbf{R}_{f,i} = 0$ . Detailed examples are worked out  
 31 below.

32 The sum of distances has been used as a model for the configurational entropy  
 33  $S = -k_B \sum_n P_n \ln(P_n)$ , because the configurations on the square grid are discrete and  
 34 differ so that the standard formula  $S = k_B \ln(W)$  does not strictly apply. The sum of  
 35 jump distances in the Moore neighborhood can be argued to approximate  $W$  (but not  
 36 the logarithm) apart from some scaling factor. This crude approximation exhibits the  
 37 essential features of entropy: The distance sum is zero, if there is only one possible  
 38 configuration, and it grows with the number of accessible configurations. For purpose  
 39 of calculating a jump probability  $p = \exp\left\{-\frac{\Delta A}{k_B T}\right\}$  this suffices.

40 In each jump step, an initially occupied cell  $i$  is selected at random and  $p$  is  
 41 evaluated for all possible jumps to neighboring empty cells as potential final cells  $f$ . If  
 42 for one or more jumps  $p \geq 1$  is calculated,  $p$  is set to 1 and the destination cell of the  
 43 jump picked at random from this subset of all potential jumps. If all neighbor cells are  
 44 occupied,  $p = 0$ , and no jump is counted. If  $0 < p < 1$  the destination cell is chosen at  
 45 random from all those with the same largest jump probability  $p < 1$ . In the reported  
 46 simulations, the Boltzmann constant  $k_B$  has been set to 1 and so has the shortest  
 47 distance between neighboring cells.

48 Two other jump algorithms for choosing the destination cell were also tested:  
 49 1) Equal probability for all unoccupied neighbor cells, assigning jump probability zero  
 50 to occupied cells, and 2) equal probability for choosing the destination cell from all  
 51 neighbor cells. Respective results are reported in the main body of the manuscript.

52

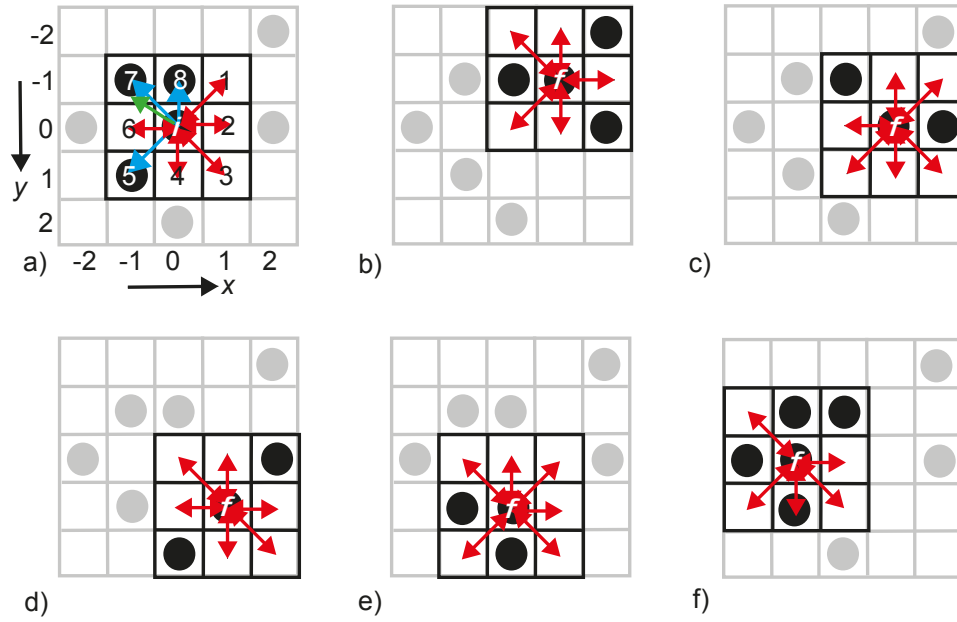

53

54 Figure S2. Checkerboard randomly occupied by particles represented by filled circles.  
 55 a) The cells surrounding the initial particle position  $i$  are numbered clockwise from 1 to  
 56 8. Cells 5, 7, and 8 are occupied, the others are empty. The force (green arrow) on the  
 57 center particle is calculated as the sum of forces exerted from all particles in the  
 58 occupied nearest neighbor cells (blue arrows). The entropy is estimated from the sum  
 59 of distances to all neighboring free cells (red double arrows). b-f) The center particle in  
 60 a) can jump to any of the free cells 1, 2, 3, 4, and 6, each of which has its own entropy.  
 61 The final position  $f$  of the jump is identified with a bias given by the jump probability  
 62 based on a simple heuristic model of the free jump-energy difference.

63

64 *Example (Fig. S2):*

65 - Calculation of internal energy change  $\Delta U_{f,i} = -(\mathbf{F}_f - \mathbf{F}_i)\Delta\mathbf{R}_{f,i} \approx \mathbf{F}_i\Delta\mathbf{R}_{f,i}$ :

$$66 \quad \mathbf{F}_i = \left[ 0 + 0 + 0 + 0 + \frac{1}{2^{3/2}} \begin{pmatrix} -1 \\ 1 \end{pmatrix} + 0 + \frac{1}{2^{3/2}} \begin{pmatrix} -1 \\ -1 \end{pmatrix} + \begin{pmatrix} 0 \\ -1 \end{pmatrix} \right] = \begin{pmatrix} -2^{-1/2} \\ -1 \end{pmatrix},$$

$$67 \quad \Delta\mathbf{R}_1 = \begin{pmatrix} 1 \\ -1 \end{pmatrix}, \Delta\mathbf{R}_2 = \begin{pmatrix} 1 \\ 0 \end{pmatrix}, \Delta\mathbf{R}_3 = \begin{pmatrix} 1 \\ 1 \end{pmatrix}, \Delta\mathbf{R}_4 = \begin{pmatrix} 0 \\ 1 \end{pmatrix},$$

$$68 \quad \Delta\mathbf{R}_5 = \begin{pmatrix} 0 \\ 0 \end{pmatrix}, \Delta\mathbf{R}_6 = \begin{pmatrix} -1 \\ 0 \end{pmatrix}, \Delta\mathbf{R}_7 = \begin{pmatrix} 0 \\ 0 \end{pmatrix}, \Delta\mathbf{R}_8 = \begin{pmatrix} 0 \\ 0 \end{pmatrix}.$$

69 The values of  $\Delta U$  for the 8 neighboring cells are

$$70 \quad \Delta U = \left\{ -2^{-\frac{1}{2}} + 1, -2^{-\frac{1}{2}}, -2^{-\frac{1}{2}} - 1, -1, 0, 2^{-\frac{1}{2}}, 0, 0 \right\}.$$

71 - Estimation of entropies  $S$  from the distances  $|\Delta\mathbf{R}|$  to all 8 neighbors in the particle-  
 72 centered tic-tac-toe frame:

$$73 \quad \text{Initial state (Fig. 2a): } S_i = 2^{\frac{1}{2}} + 1 + 2^{\frac{1}{2}} + 1 + 0 + 1 + 0 + 0 = 3 + 2 \cdot 2^{\frac{1}{2}}$$

$$74 \quad \text{Final state 1 (Fig. 2b): } S_f = 0 + 1 + 0 + 1 + 2^{\frac{1}{2}} + 0 + 2^{\frac{1}{2}} + 1 = 3 + 2 \cdot 2^{\frac{1}{2}}$$

$$75 \quad \text{Final state 2 (Fig. 2c): } S_f = 2^{\frac{1}{2}} + 0 + 2^{\frac{1}{2}} + 1 + 2^{\frac{1}{2}} + 1 + 0 + 1 = 3 + 3 \cdot 2^{\frac{1}{2}}$$

$$76 \quad \text{Final state 3 (Fig. 2d): } S_f = 0 + 1 + 2^{\frac{1}{2}} + 1 + 0 + 1 + 2^{\frac{1}{2}} + 1 = 4 + 2 \cdot 2^{\frac{1}{2}}$$

77 Final state 4 (Fig. 2e):  $S_f = 2^{\frac{1}{2}} + 1 + 2^{\frac{1}{2}} + 0 + 2^{\frac{1}{2}} + 0 + 2^{\frac{1}{2}} + 1 = 2 + 4 \cdot 2^{\frac{1}{2}}$

78 Final state 5:  $S_f = 0$

79 Final state 6 (Fig. 2f):  $S_f = 0 + 1 + 2^{\frac{1}{2}} + 0 + 2^{\frac{1}{2}} + 0 + 2^{\frac{1}{2}} + 0 = 1 + 3 \cdot 2^{\frac{1}{2}}$

80 Final state 7:  $S_f = 0$

81 Final state 8:  $S_f = 0$

82 The possible entropy changes are

$$83 \Delta S = S_f - S_i = \left\{ 0, \sqrt{2}, 1, -1 + 2 \cdot 2^{\frac{1}{2}}, -3 - 2 \cdot 2^{\frac{1}{2}}, -2 + 2^{\frac{1}{2}}, -3 - 2 \cdot 2^{\frac{1}{2}}, -3 - 2 \cdot 2^{\frac{1}{2}} \right\}.$$

84

### 85 Temperature and pressure dependences of exchange in the complex pore

86 Relevant results for the pore structure of Fig. 3a are summarized in six graphs in Fig.  
 87 S3. All parameters are relative quantities without units. The top three graphs a), b) and  
 88 c) show the variation of  $a_{sy}$  with temperature for a population fraction of 0.2  
 89 corresponding that of a gas. The asymmetry parameter assumes positive and negative  
 90 values in a seemingly erratic but reproducible manner in the range of  $-0.7\% < a_{sy} <$   
 91  $0.4\%$  for repulsive interaction (Fig. S3a), i. e. for the definition of the force between  
 92 particles as illustrated in Fig. 2a. The interaction can be changed to attractive by  
 93 changing the sign of  $\Delta U$  in the expression for the free energy. In this case the  
 94 asymmetry parameter varies as well, however, only between  $\approx 0\% < a_{sy} < 0.5\%$  (Fig.  
 95 S3b). In either case, up to roughly 0.5% of all jumps on the checkerboard proceed in  
 96 a circular fashion between the three sites. With reference to Fig. 1, positive  $a_{sy}$  reports  
 97 that the straight entry route from the bulk into the small pore is preferred over the detour  
 98 via the grain surface. This is the case for attractive interaction at  $T < 2$  (Fig. S3b). For  
 99 repulsive interactions and temperatures  $T > 1$ ,  $a_{sy}$  is negative and the opposite route  
 100 is preferred (Fig. S3a). If the destination cell is chosen at random from all free neighbor  
 101 cells, then the simulation produces largely noise for  $a_{sy}$  (Fig. S3c). The noise level is  
 102 two orders of magnitude smaller than the maximum absolute values of  $a_{sy}$  obtained  
 103 with either repulsive (Fig. S3a) or attractive interaction (Fig. S3b).

104 At the extrema of the  $a_{sy}(T)$  curves in Figs. S3a,b the dependences of the  
 105 asymmetry parameters on pressure corresponding to population density were  
 106 investigated (Figs. S3d-f). The variations with population density are smoother than  
 107 those with temperature. Positive and negative values of  $a_{sy}$  result at a low temperature  
 108 of  $T = 0.2$  for repulsive interaction (Fig. S3d), whereas either negative or positive

109 values arise for repulsive (Fig. S3e) and attractive (Fig. S3f) interactions at higher  
 110 temperatures of  $T = 2.2$  and  $1.3$ , respectively. Interestingly, two well developed  
 111 positive modes result for attractive interaction at  $T = 1.3$ .

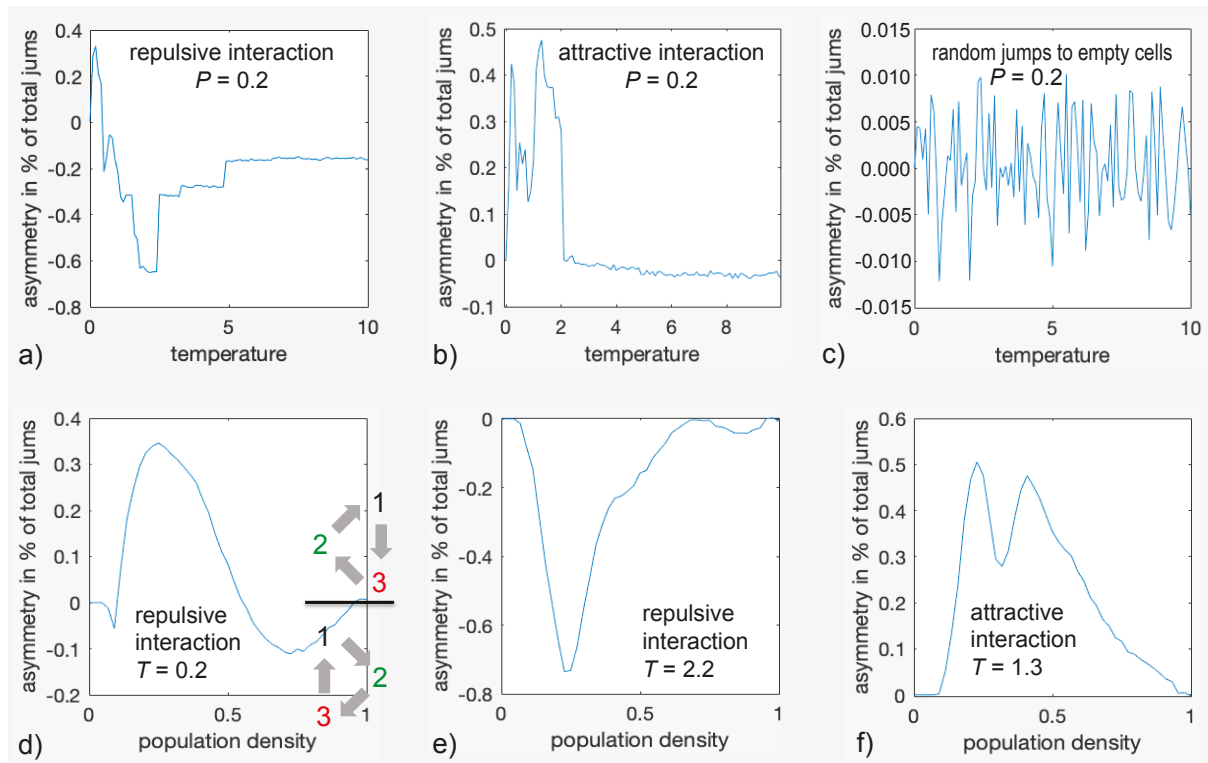

112  
 113 Figure S3. Asymmetry parameters  $a_{sy}$  for diffusion in and out of the grain pore depicted  
 114 in Fig. 3a as a function of relative temperature  $T$  (top row) at a population density of  
 115 0.2 and relative pressure or population density  $P$  (bottom row) at different  
 116 temperatures. a)  $a_{sy}(T)$  for repulsive interaction. b)  $a_{sy}(T)$  for attractive interaction.  
 117 c)  $a_{sy}(T)$  for jumps chosen randomly from all free neighbor cells. d)  $a_{sy}(P)$  for repulsive  
 118 interaction at  $T = 0.2$ . e)  $a_{sy}(P)$  for repulsive interaction at  $T = 2.2$ . f)  $a_{sy}(P)$  for  
 119 attractive interaction at  $T = 1.3$ .  
 120

121 **Population density distributions for different pores and thermodynamic**  
 122 **parameters**

123

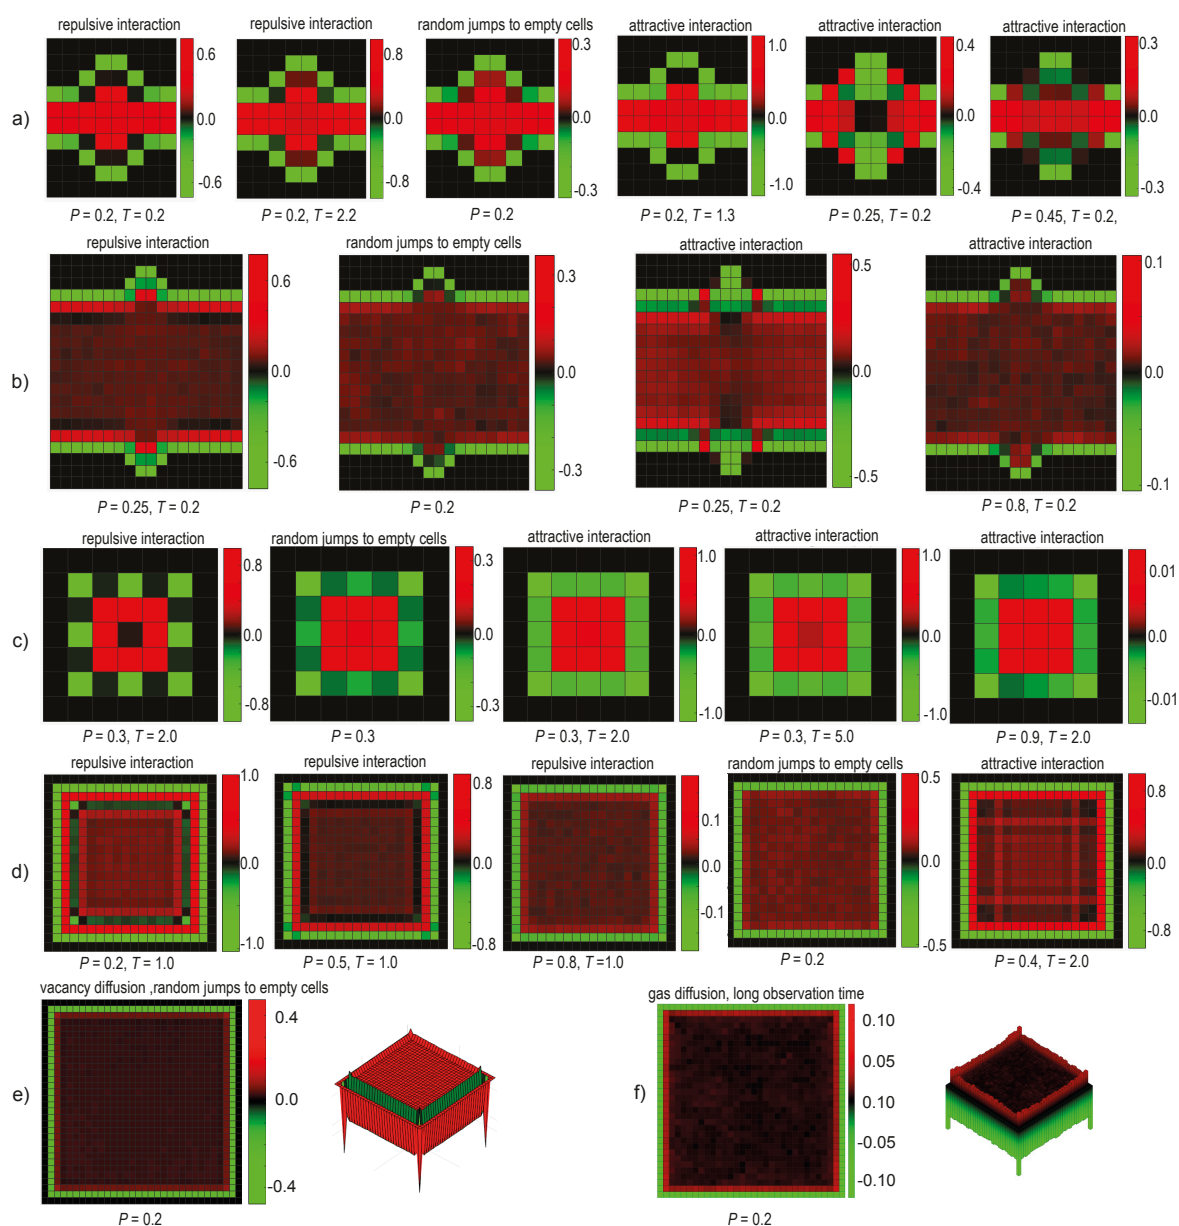

124

125 Figure S4. Maps showing the deviations of the particle density from its mean across  
 126 the pore. a,b) Model for a porous solid,  $10^7$  jumps. c-e) Square pore,  $10^7$  jumps. The  
 127 color scales are different in each plot. The particle concentrations vary more strongly  
 128 with pressure  $P$  than with temperature  $T$ . e) Vacancy diffusion in a  $32 \times 32$  pore with  
 129 random jumps to empty neighbor cells. f) Gas diffusion in a  $32 \times 32$  pore at a long  
 130 observation time of  $1, 10^8$  jumps.

131

132 **Matlab code for vacancy-diffusion simulations**

```

133 % Restricted Diffusion
134 %
135 % Define input parameters
136 ScanP = 0; % 0 = single pass; 1 = scan Pop; 2 = scan T
137 pore = 2; % 1: dent pore (8 x 10); 2: box pore (7 x 7); 3:
138 parallel planes
139 Pop = 0.3; % population-density parameter
140 T = 0.8; % temperature parameter
141 propflag = 0; % 1: active jump probability, 0: random jumps
142 Thermo = 0; % 1: positive DU; 0: DA = 0; else: negative DU
143 f1 = 1; % scale factor for force among particles
144 f2 = 1; % scale factor for force by wall
145 f3 = 1; % scale factor for force by active site
146 Ny = 7; % number of cells in y direction
147 Nx = 7; % number of cells in x direction
148 DeltaP = 0.04; % population-density increment
149 kB = 1; % thermal energy constant
150 DeltaT = 0.04; % temperature increment
151 Njump = 10000000; % number of jumps
152 % Constants and derived parameters
153 Nx1 = round(Nx/2);
154 Ny1 = round(Ny/2);
155 Nyc = 3; % detection cell number in y direction
156 Nxc = 3; % detection cell number in x direction
157 Nya = 1; % active site cell number in y direction
158 Nxa = 4; % active site cell number in x direction
159 root2 = sqrt(2);
160 fc = 1/(2*root2); % scale factor for force from corner cells
161 nix=zeros(2,1);
162 % SuperLoop for parameter variation
163 SLcount = 0; % number of parameter variations: default is 0
164 SLn0 = 1; % parameter-variation counter
165 if ScanP == 1 SLcount = 25; end % vary Pop
166 if ScanP == 2 SLcount = 50; end % vary T
167 SLp = zeros(6,SLcount+1);
168 if ScanP == 1 % population scan
169     Pop = 0;
170     SLn0 = 2;
171 end
172 if ScanP == 2 % temperature scan
173     T = 0;
174     SLn0 = 2;
175 end
176 for SLn = SLn0:SLcount+1 % parameter-variation loop starts here *****
177     if ScanP == 1
178         Pop = Pop + DeltaP;
179         SLp(1,SLn) = Pop;
180     end
181     if ScanP == 2
182         T = T + DeltaT;
183         SLp(1,SLn) = T;
184     end
185     k = zeros(3,3); % kinetic matrix
186     tau = 0; % initiate calculation of autocorrelation function
187     taumax = 18*Nx;
188     if Ny > Nx taumax = 18*Ny; end
189     p2 = 2; % determine next power of 2 larger than taumax
190     while p2 < taumax p2 = p2*2; end
191     taumax = p2;
192     acorr = zeros(taumax,1);
193     noisevec = zeros(taumax,1);

```



```

194 % Set up pore space with boundaries
195 space = zeros(Ny,Nx);
196 if pore > 2 % parallel planes
197     space(1,:) = 2;
198     space(Ny,:) = 2;
199     space(1,Nxa) = 3; % active site
200     space(Ny,Nxa) = 3; % active site
201 end
202 if pore == 2 % box pore
203     space(1,:) = 2;
204     space(Ny,:) = 2;
205     space(:,1) = 2;
206     space(:,Nx) = 2;
207     space(Nya,Nxa) = 3; % active site
208 end
209 if pore < 2 % dent pore
210     space(1,:) = 2;
211     space(2,:) = 2;
212     space(3,:) = 2;
213     space(Ny-2,:) = 2;
214     space(Ny-1,:) = 2;
215     space(Ny,:) = 2;
216     if Ny >= 8 % define holes
217         if Nx >= 6
218             space(3,Nx1-1) = 0;
219             space(3,Nx1) = 0;
220             space(3,Nx1+1) = 0;
221             space(3,Nx1+2) = 0;
222             space(2,Nx1-1) = 3;
223             space(2,Nx1) = 0;
224             space(2,Nx1+1) = 0;
225             space(2,Nx1+2) = 3;
226             space(1,Nx1-1) = 3;
227             space(1,Nx1) = 3;
228             space(1,Nx1+1) = 3;
229             space(1,Nx1+2) = 3;
230             space(Ny-2,Nx1-1) = 0;
231             space(Ny-2,Nx1) = 0;
232             space(Ny-2,Nx1+1) = 0;
233             space(Ny-2,Nx1+2) = 0;
234             space(Ny-1,Nx1-1) = 3;
235             space(Ny-1,Nx1) = 0;
236             space(Ny-1,Nx1+1) = 0;
237             space(Ny-1,Nx1+2) = 3;
238             space(Ny,Nx1-1) = 3;
239             space(Ny,Nx1) = 3;
240             space(Ny,Nx1+1) = 3;
241             space(Ny,Nx1+2) = 3;
242         end
243     end
244 end
245 emptypore = space; % keep empty pore for reference
246 % Count and populate available cells
247 nc0 = 0; % count available cells
248 for nx = 1:Nx
249     for ny = 1:Ny
250         if space(ny,nx) == 0 nc0 = nc0 + 1; end
251     end
252 end
253 noc = round(Pop*nc0); % number of cells to be occupied
254 if noc == nc0 noc = nc0-1; end
255 if noc == 0 noc = 1; end
256 cellvec = zeros(noc,3); % track occupied cells

```

```

257     n = 0;
258     while n < noc
259         nxi = randi(Nx);
260         nyi = randi(Ny);
261         if space(nyi,nxi) == 0
262             space(nyi,nxi)=1; % populate
263             n = n+1;
264             cellvec(n,1) = n; % track occupied cells
265             cellvec(n,2) = nyi;
266             cellvec(n,3) = nxi;
267         end
268     end
269     poc = -noc/nc0;
270     puc = 1+poc;
271     avspace = space; % initiate summing occupation maps
272 % Display cell population
273 subplot(3,2,1)
274 heatmap(space);
275 colormap(redgreencmap)
276 title('initial population');
277 pause(0.1);
278 njactive = 0; % number of active jumps
279 for njump = 1:Njump % BEGIN JUMP LOOP
280     ncell0 = randi(noc);
281     nyi = cellvec(ncell0,2);
282     nxi = cellvec(ncell0,3);
283 % Determine force on cell
284     f = [0,0]; % force from all neighbors proportional to 1/(r*r)
285     nxip1 = nxi+1; if nxip1 > Nx nxip1 = 1; end
286     nxim1 = nxi-1; if nxim1 < 1 nxim1 = Nx; end
287     nyip1 = nyi+1; if nyip1 > Ny nyip1 = 1; end
288     nyim1 = nyi-1; if nyim1 < 1 nyim1 = Ny; end
289     nocn = 0; % count occupied neighbor cells
290     ki = 1; % identify initial jump environment
291     c1 = space(nyim1,nxip1); % possible final position 1
292     c2 = space(nyi,nxip1); % possible final position 2
293     c3 = space(nyip1,nxip1); % possible final position 3
294     c4 = space(nyip1,nxi); % possible final position 4
295     c5 = space(nyip1,nxim1); % possible final position 5
296     c6 = space(nyi,nxim1); % possible final position 6
297     c7 = space(nyim1,nxim1); % possible final position 7
298     c8 = space(nyim1,nxi); % possible final position 8
299     if c1 > 0 nocn=nocn+1;
300         if c1 < 2 f = f + [1,-1]*fc*f1; end
301         if c1 == 2 f = f + [1,-1]*fc*f2; end
302         if c1 > 2 f = f + [1,-1]*fc*f3; end
303         if c1 > ki ki = c1; end
304     end
305     if c2 > 0 nocn=nocn+1;
306         if c2 < 2 f = f + [1,0]*f1; end
307         if c2 == 2 f = f + [1,0]*f2; end
308         if c2 > 2 f = f + [1,0]*f3; end
309         if c2 > ki ki = c2; end
310     end
311     if c3 > 0 nocn=nocn+1;
312         if c3 < 2 f = f + [1,1]*fc*f1; end
313         if c3 == 2 f = f + [1,1]*fc*f2; end
314         if c3 > 2 f = f + [1,1]*fc*f3; end
315         if c3 > ki ki = c3; end
316     end
317     if c4 > 0 nocn=nocn+1;
318         if c4 < 2 f = f + [0,1]*f1; end
319         if c4 == 2 f = f + [0,1]*f2; end

```

```

320     if c4 > 2 f = f + [0,1]*f3; end
321     if c4 > ki ki = c4; end
322 end
323 if c5 > 0 nocn=nocn+1;
324     if c5 < 2 f = f + [-1,1]*fc*f1; end
325     if c5 == 2 f = f + [-1,1]*fc*f2; end
326     if c5 > 2 f = f + [-1,1]*fc*f3; end
327     if c5 > ki ki = c5; end
328 end
329 if c6 > 0 nocn=nocn+1;
330     if c6 < 2 f = f + [-1,0]*f1; end
331     if c6 == 2 f = f + [-1,0]*f2; end
332     if c6 > 2 f = f + [-1,0]*f3; end
333     if c6 > ki ki = c6; end
334 end
335 if c7 > 0 nocn=nocn+1;
336     if c7 < 2 f = f + [-1,-1]*fc*f1; end
337     if c7 == 2 f = f + [-1,-1]*fc*f2; end
338     if c7 > 2 f = f + [-1,-1]*fc*f3; end
339     if c7 > ki ki = c7; end
340 end
341 if c8 > 0 nonc=nocn+1;
342     if c8 < 2 f = f + [0,-1]*f1; end
343     if c8 == 2 f = f + [0,-1]*f2; end
344     if c8 > 2 f = f + [0,-1]*f3; end
345     if c8 > ki ki = c8; end
346 end
347 % Determine displacement-energy and -entropy changes
348 DU = zeros(8,1);
349 DS = zeros(8,1);
350 p = zeros(8,2); % track cell numbers and jump probabilities
351 nx = nxi; ny = nyi; % initial position
352 Sinitial = myentropy(space,Nx,nx,ny,root2);
353 space(nyi,nxi) = 0; % jump from here
354 if c1 == 0
355     DU(1) = f*[1;-1];
356     nx = nxip1; ny = nyim1; % final position 1
357     DS(1) = myentropy(space,Nx,nx,ny,root2) - Sinitial;
358 end
359 if c2 == 0
360     DU(2) = f*[1;0];
361     nx = nxip1; ny = nyi; % final position 2
362     DS(2) = myentropy(space,Nx,nx,ny,root2) - Sinitial;
363 end
364 if c3 == 0
365     DU(3) = f*[1;1];
366     nx = nxip1; ny = nyip1; % final position 3
367     DS(3) = myentropy(space,Nx,nx,ny,root2) - Sinitial;
368 end
369 if c4 == 0
370     DU(4) = f*[0;1];
371     nx = nxi; ny = nyip1; % final position 4
372     DS(4) = myentropy(space,Nx,nx,ny,root2) - Sinitial;
373 end
374 if c5 == 0
375     DU(5) = f*[-1;1];
376     nx = nxim1; ny = nyip1; % final position 5
377     DS(5) = myentropy(space,Nx,nx,ny,root2) - Sinitial;
378 end
379 if c6 == 0
380     DU(6) = f*[-1;0];
381     nx = nxim1; ny = nyi; % final position 6
382     DS(6) = myentropy(space,Nx,nx,ny,root2) - Sinitial;

```

```

383 end
384 if c7 == 0
385     DU(7) = f*[-1;-1];
386     nx = nxim1; ny = nyim1; % final position 7
387     DS(7) = myentropy(space,Nx,nx,ny,root2)- Sinitial;
388 end
389 if c8 == 0
390     DU(8) = f*[0;-1];
391     nx = nxi; ny = nyim1; % final position 8
392     DS(8) = myentropy(space,Nx,nx,ny,root2)- Sinitial;
393 end
394 space(nyi,nxi) = 1; % jump from here
395 % Calculate displacement probabilities
396 if Thermo ~= 0 % with thermodynamic constraints
397     if Thermo == 1 DA = DU - T*DS;
398     else DA = -DU - T*DS; end
399 else DA = zeros(8,1);
400 end
401 p(:,1) = exp(-DA/(kB*T));
402 p(:,2) = 1:8;
403 if propflag ==1
404     if c1 ~= 0 p(1,1) = 0; end % exclude occupied destination cells
405     if c2 ~= 0 p(2,1) = 0; end
406     if c3 ~= 0 p(3,1) = 0; end
407     if c4 ~= 0 p(4,1) = 0; end
408     if c5 ~= 0 p(5,1) = 0; end
409     if c6 ~= 0 p(6,1) = 0; end
410     if c7 ~= 0 p(7,1) = 0; end
411     if c8 ~= 0 p(8,1) = 0; end
412 end
413 % Sort displacement probabilities and determine destination-cell number
414 P = sortrows(p, 'descend');
415 kf = ki;
416 n1 = 1;
417 if P(1,1) >= 1 % if no energetic constraints for jump
418     for nc = 2:8
419         if P(nc,1) >= 1 n1 = n1+1; end
420     end
421 else
422     for nc = 2:8
423         if P(1,1) == P(nc,1) n1 = n1+1; end
424     end
425 end
426 ncell = P(randi(n1),2); % randomly pick the destination cell
427 % Identify destination cell
428 space(nyi,nxi) = 0; % jump from here *****
429 if ncell > 0
430     if ncell == 1 nyi=nyim1; nxi=nxip1; end
431     if ncell == 2 nxi=nxip1; end
432     if ncell == 3 nyi=nyip1; nxi=nxip1; end
433     if ncell == 4 nyi=nyip1; end
434     if ncell == 5 nyi=nyip1; nxi=nxim1; end
435     if ncell == 6 nxi=nxim1; end
436     if ncell == 7 nyi=nyim1; nxi=nxim1; end
437     if ncell == 8 nyi=nyim1; end
438 end
439 jumpflag = 1; % default: jump is possible
440 if space(nyi,nxi) ~= 0 % jump not possible
441     nyi = cellvec(ncell0,2);
442     nxi = cellvec(ncell0,3);
443     jumpflag = 0;
444 end
445 space(nyi,nxi) = 1; % jump to there *****

```

```

446 cellvec(ncell0,2) = nyi;           % update cell vector
447 cellvec(ncell0,3) = nxi;
448 % Display cell population
449 njactive = njactive +1;
450 if njactive <= 10
451     subplot(3,2,1)
452     heatmap(space);
453     colormap(redgreencmap)
454     title(['jump ', num2str(njump)]);
455     pause(0.1);
456 end
457 % Identify destination-cell environment
458 nxip1 = nxi+1; if nxip1 > Nx nxip1 = 1; end
459 nxim1 = nxi-1; if nxim1 < 1 nxim1 = Nx; end
460 nyip1 = nyi+1; if nyip1 > Ny nyip1 = 1; end
461 nyim1 = nyi-1; if nyim1 < 1 nyim1 = Ny; end
462 kf = 1;
463 c1 = space(nyim1,nxip1); if c1 > kf, kf = c1; end
464 c2 = space(nyi,nxip1); if c2 > kf, kf = c2; end
465 c3 = space(nyip1,nxip1); if c3 > kf, kf = c3; end
466 c4 = space(nyip1,nxi); if c4 > kf, kf = c4; end
467 c5 = space(nyip1,nxim1); if c5 > kf, kf = c5; end
468 c6 = space(nyi,nxim1); if c6 > kf, kf = c6; end
469 c7 = space(nyim1,nxim1); if c7 > kf, kf = c7; end
470 c8 = space(nyim1,nxi); if c8 > kf, kf = c8; end
471 % Update kinetix matrix
472 if propflag == 0 k(kf,ki) = k(kf,ki) + 1;
473 else if jumpflag ~= 0 k(kf,ki) = k(kf,ki) + 1; end
474 end
475 if ScanP == 0           % compute noise autocorrelation
476     if space(Nyc,Nxc) > 0
477         noise = puc;     % default: position autocorrelation
478     else noise = poc;
479     end
480     avspace = avspace + space;           % determine mean population map
481     for ntau = 2:taumax noisevec(ntau-1) = noisevec(ntau); end
482     noisevec(taumax) = noise;           % record noise
483     for ntau = 1:taumax           % update autocorrelation function
484         acorr(ntau)=acorr(ntau)+noisevec(taumax)*noisevec(taumax+1-ntau);
485     end
486 end
487 end                                     %%%%%% END JUMP LOOP
488 % Show results
489 pco = 100*noc/nc0; % percentage of occupied cells
490 ksum = sum(sum(k)); % total number of jumps
491 k = k*100/ksum; % normalize kinetic matrix to % of jumps
492 disp(num2str(datestr(now, 'dd/mm/yy-HH:MM'))); % show date & time
493 disp(['occupied cells: # ', num2str(noc), ', % ', num2str(pco)]);
494 disp(['# jumps: ', num2str(ksum)]);
495 disp(['P: ', num2str(Pop), ', T: ', num2str(T)]);
496 asy1 = k(1,2)-k(2,1); asy2 = k(1,3)-k(3,1); asy3 = k(2,3)-k(3,2);
497 disp(['k12-k21=', num2str(asy1), ', k13-31=', num2str(asy2), ', k23-
498 k32=', num2str(asy3)]);
499 disp('normalized kinetic matrix (number of jumps in %)');
500 disp(k);
501 SLp(2,SLn) = asy1; % wrap up parameter-variation loop
502 if ScanP == 0
503     acorr = acorr/ksum;
504     avspace = avspace*nc0/(ksum*noc);
505     spacesum = 0;
506     for ny = 1:Ny
507         for nx = 1:Nx

```

```

508         if emptypore(ny,nx) == 0 spacesum = spacesum + avspace(ny,nx);
509     end
510     end
511     end
512     spacesum = spacesum/nc0;
513     maxocc = 0; % extrema of avspace
514     minocc = 0;
515     for ny = 1:Ny % set boundary to 1
516         for nx = 1:Nx
517             if emptypore(ny,nx) > 0, avspace(ny,nx) = 0; end
518             if emptypore(ny,nx) == 0 avspace(ny,nx) = avspace(ny,nx) -
519 spacesum; end
520             if avspace(ny,nx) < minocc minocc = avspace(ny,nx); end
521             if avspace(ny,nx) > maxocc maxocc = avspace(ny,nx); end
522         end
523     end
524     absmax = maxocc;
525     if -minocc > maxocc absmax = -minocc; end
526     subplot(3,2,2)
527     heatmap(avspace);
528     caxis([-absmax,absmax]);
529     colormap(redgreenmap)
530     title('variation of average cell population');
531     xlabel(['Thermo ',num2str(Thermo),' , Pop ',num2str(Pop),' , T
532 ',num2str(T),' , asy ',num2str(asy3)]);
533     subplot(3,2,3) % plot autocorrelation function
534     ylim([0,0.3]); % *****
535     plot(acorr);
536     xlabel('time delay');
537     ylabel('autocorrelation');
538     ntau = 2^nextpow2(taumax);
539     as = fft(acorr,ntau);
540     ass = complex(zeros(ntau));
541     for n = 1:ntau/2 % reshuffle
542         ass(n) = as(ntau/2 + n);
543         ass(ntau/2 + n) = as(n);
544     end
545     xaxis = zeros(1,ntau);
546     for n=1:ntau xaxis(n) = n-ntau/2-1; end % xaxis for subplots
547     ylim([0,0.3]); %*****
548     subplot(3,2,4) % plot FFT of autocorrelation function
549     plot(xaxis,real(ass)); % real part
550     xlabel('frequency');
551     ylabel('spectral amplitude');
552     xlim([-ntau/2-1 ntau/2]);
553     subplot(3,2,5) % plot FFT of autocorrelation function
554     plot(xaxis,imag(ass)); % imaginary part
555     xlim([-ntau/2-1 ntau/2]);
556     xlabel('frequency');
557     ylabel('spectral amplitude');
558     xlim([-ntau/2-1 ntau/2]);
559     subplot(3,2,6) % plot nothing
560     avs = zeros(Ny+2,Nx+2);
561     for nx=1:Nx
562         for ny=1:Ny
563             avs(ny+1,nx+1) = avspace(ny,nx);
564         end
565     end
566     surf(avs);
567 end
568 end
569 %%% End parameter-variation loop and show result %%%
570 if ScanP > 0

```

```

571     x = zeros(SLcount+1);
572     y = zeros(SLcount+1);
573     for Sln = 1:SLcount+1
574         x(Sln) = SLp(1,Sln); % poulation or temperature
575         y(Sln) = SLp(2,Sln); % asymmetry of exchange matrix
576     end
577     subplot(3,2,2) % plot nothing
578     plot(nix);
579     xlabel('nix');
580     ylabel('nix');
581     title(['Thermo ',num2str(Thermo),' Pop ',num2str(Pop),' T
582 ',num2str(T),' asy ',num2str(asy3)]);
583     subplot(3,2,3)
584     plot(x,y);
585     if ScanP == 1 xlabel('population density'); end
586     if ScanP == 2 xlabel('temperature'); end
587     ylabel('asymmetry in % of total jums');
588 end
589
590 function S = myentropy(space,Nx,nx,ny,root2)
591     S = 0;
592     nxp1 = nx+1; if nxp1 > Nx nxp1 = 1; end
593     nxm1 = nx-1; if nxm1 < 1 nxm1 = Nx; end
594     nyp1 = ny+1;
595     nyml = ny-1;
596     if space(nym1,nxp1) == 0 S = S + root2; end
597     if space(ny,nxp1) == 0 S = S + 1; end
598     if space(nyp1,nxp1) == 0 S = S + root2; end
599     if space(nyp1,nx) == 0 S = S + 1; end
600     if space(nyp1,nxm1) == 0 S = S + root2; end
601     if space(ny,nxm1) == 0 S = S + 1; end
602     if space(nym1,nxm1) == 0 S = S + root2; end
603     if space(nym1,nx) == 0 S = S + 1; end
604 end
605

```

### 606 Matlab code for gas-diffusion simulations

```

607 function [exchangemat,population,asy] =
608 gasdifsim(speedscale,numparticles,numsteps,dt,diameter,center,numbins)
609
610 %%%%%% This simulation generates an exchange matrix and population density
611 %%%%%% map for gas particles undergoing elastic collisions. In order the
612 %%%%%% input variables are the scaling factor for the inital velocity
613 %%%%%% profile, the number of particles, the number of time steps, the
614 %%%%%% duration of the time step in arbitrary time units, the diameter of
615 %%%%%% the particles in arbitrary length units, an array of the coordinates
616 %%%%%% for the center of each defect site (i.e. for 7 defects [-0.1 0.1 0.3
617 %%%%%% 0.5 0.7 0.9 1.1], and the number of bins.
618
619
620

```

```
621     %%%%% Initial condition inputs %%%%%
622
623     radius(1:numparticles,1) = diameter/2; % same radius for all particles
624     initials = speedscales.*randn([numparticles 1]); % each particle has a random
625     initial speed
626
627     t = 0; % start time
628     timearray = (t:dt:(t+dt*numsteps)); % full time array
629     step = 1 % iteration step
630     exchangemat(3,3,numbins+2) = 0; % creates a set of 3x3 matrices, one for each
631     defect site
632
633     bincenter = (1/(2*numbins)):(1/numbins):1;
634
635
636     %%%%% Generates randomized particles %%%%%
637
638     %Randomizing initial positions and ensuring no overlap of particles
639
640     initialpos = round(rand(numparticles,1)*(numbins^2-1))+1;
641     for ii = 2:numparticles
642         while any(initialpos(ii)==initialpos(1:(ii-1)))
643             initialpos(ii) = round(rand*(numbins^2-1))+1;
644         end
645     end
646
647     initialpos = initialpos/numbins;
648     binx = ceil(initialpos);
649     biny = round((initialpos-(binx-1))./diameter);
650
651     for ii = 1:numparticles
652         initialx(ii,1) = bincenter(binx(ii));
653         initialy(ii,1) = bincenter(biny(ii));
654     end
```



```
655
656     positionx = initialx; positiony = initialy; % Tracking current positions
657
658     theta = 2.*pi.*randn([numparticles 1]); % randomized initial angle of travel
659     velocityx = cos(theta).*initialspeed; velocityy = sin(theta).*initialspeed; % x and y
660 velocity components assigned based on random angle calculation
661
662     particles = [positionx,positiony,velocityx,velocityy]; % each row defines a particle
663 with initial positions, velocities, and radius
664     pos2d = [positionx,positiony]; % Tracking both current position components in one
665 array
666
667
668     population = zeros(numbins); % empty matrix to track particle locations at each
669 step
670     binlimits = [-0.05 (bincenter(2)-bincenter(1)):(bincenter(2)-bincenter(1)):(1-
671 (bincenter(2)-bincenter(1))) 1.05];
672     % Boundary definitions for each grid element, total length of x and y
673     % walls goes from 0 to 1 in arbitrary length units. Each grid element is
674     % the length of one particle diameter or 1/numbins
675
676
677     % Populates the population density count with the initial positions.
678     % Takes the initial x and y coordinate of each particle and determines
679     % which grid element it falls into and updates corresponding matrix
680     % element by +1
681     for pp = 1:numparticles
682         for ff = 1:(numbins)
683             for gg = 1:(numbins)
684                 if pos2d(pp,1)>binlimits(ff) && pos2d(pp,1)<=binlimits(ff+1) &&
685 pos2d(pp,2)>binlimits(gg) && pos2d(pp,2)<=binlimits(gg+1)
686                     population(ff,gg) = population(ff,gg) + 1;
687                 end
688             end
689         end
690     end
```

```
689     end
690 end
691
692
693 %%%%% Moving the particles %%%%%
694
695 for hh = 1:numsteps %looping through each step
696
697     step = step+1 %increment to the next time step
698     t = t+dt; %current time
699     collisionpair = [];
700
701
702     % Compares the positions of each possible pair of particles. When
703     % the coordinates are within 1 particle diameter of each other they
704     % are considered to have collided. A list of all colliding pairs is
705     % generated.
706     for gg = 1:(numparticles-1)
707         collidingparticle1 = particles(gg,1:2);
708         for jj = (gg+1):numparticles
709             collidingparticle2 = particles(jj,1:2);
710             if norm(collidingparticle2-collidingparticle1) < diameter
711                 collisionpair = [collisionpair;gg jj];
712             end
713         end
714     end
715
716
717
718     for ll = 1:size(collisionpair,1)
719
720         collidingposition1 = particles(collisionpair(ll,1),1:2); % current position of
721 colliding particle 1
```

```
722     collidingposition2 = particles(collisionpair(lI,2),1:2); % current position of
723 colliding particle 2
724     collidingvelocity1 = particles(collisionpair(lI,1),3:4); % current velocity of
725 colliding particle 1
726     collidingvelocity2 = particles(collisionpair(lI,2),3:4); % current velocity of
727 colliding particle 2
728
729
730     % Calculation of new velocities for the elastic collision of particles
731     dr = collidingposition2 - collidingposition1;
732     dv = collidingvelocity2 - collidingvelocity1;
733     dvdotdr = dot(dv,dr);
734     d = norm(dr)^2;
735
736     newvelocity1 = collidingvelocity1 - dvdotdr./d.*(collidingposition1-
737 collidingposition2);
738     newvelocity2 = collidingvelocity2 - dvdotdr./d.*(collidingposition2-
739 collidingposition1);
740
741
742     % Replacing the pre-collision velocities with the
743     % post-collision velocities
744     velocityx(collisionpair(lI,1)) = newvelocity1(1); velocityx(collisionpair(lI,2)) =
745 newvelocity2(1);
746     velocityy(collisionpair(lI,1)) = newvelocity1(2); velocityy(collisionpair(lI,2)) =
747 newvelocity2(2);
748     particles = [positionx,positiony,velocityx,velocityy];
749     end
750
751     for kk = 1:numparticles
752         %checking x boundaries, deflect if collision
753         if ((particles(kk,1) - 0) < radius(1) && velocityx(kk) < 0) || ((1 - particles(kk,1))
754 < radius(1) && velocityx(kk) > 0)
755             velocityx(kk) = -1.*velocityx(kk);
```

```
756         %checking y boundaries, deflect if collision
757         elseif ((particles(kk,2) - 0) < radius(1) && velocityy(kk) < 0) || ((1 -
758 particles(kk,2)) < radius(1) && velocityy(kk) > 0)
759             velocityy(kk) = -1.*velocityy(kk);
760         end
761     end
762
763
764     % Move particles to their next position and record
765     positionx = positionx + velocityx.*dt; positiony = positiony + velocityy.*dt;
766     particles = [positionx,positiony,velocityx,velocityy];
767     pos2d((numparticles+1):(2*numparticles),:) = [positionx positiony];
768
769
770
771
772     for jj = 1:numparticles
773
774         % Update population density matrix with the new positions (see
775         % line 46)
776         for ff = 1:numbins
777             for gg = 1:numbins
778                 if pos2d(jj+numparticles,1)>binlimits(ff) &&
779 pos2d(jj+numparticles,1)<=binlimits(ff+1) && pos2d(jj+numparticles,2)>binlimits(gg)
780 && pos2d(jj+numparticles,2)<=binlimits(gg+1)
781                     population(ff,gg) = population(ff,gg) + 1;
782                 end
783             end
784         end
785
786
787
788     %%%%% Counting for the Exchange matrix %%%%%
789
```

```
790 % Site 1 is in the body of the pore, Site 2 is the wall, and Site 3
791 % is the defect site.
792
793     for defectsite = 1:(numbins+2)
794
795         % Particle is found at a Site 3 grid space at previous time step
796         if (pos2d(jj,1)<diameter && (pos2d(jj,2)<(center(defectsite)+3*diameter/2) &&
797 pos2d(jj,2)>(center(defectsite)-3*diameter/2)))
798
799             % Particle is still in a Site 3 grid space on current step
800             if (pos2d(numparticles+jj,1)<diameter &&
801 (pos2d(numparticles+jj,2)<(center(defectsite)+3*diameter/2) &&
802 pos2d(numparticles+jj,2)>(center(defectsite)-3*diameter/2)))
803                 exchangemat(3,3,defectsite) = exchangemat(3,3,defectsite) + 1;
804
805             % Particle moved to a Site 1 grid space on current step
806             elseif (pos2d(numparticles+jj,1)>=diameter && (1-
807 pos2d(numparticles+jj,1))>=diameter) && (pos2d(numparticles+jj,2)>=diameter &&
808 (1-pos2d(numparticles+jj,2))>=diameter)
809                 exchangemat(3,1,defectsite) = exchangemat(3,1,defectsite) + 1;
810
811             % Particle moved to a Site 2 grid space on current step
812             else
813                 exchangemat(3,2,defectsite) = exchangemat(3,2,defectsite) + 1;
814             end
815
816
817         % Particle is found at a Site 1 grid space at previous time step
818         elseif (pos2d(jj,1)>=diameter && (1-pos2d(jj,1))>=diameter) &&
819 (pos2d(jj,2)>=diameter && (1-pos2d(jj,2))>=diameter)
820
821             % Particle is still in a Site 1 grid space on current step
```

```
822         if (pos2d(numparticles+jj,1)>=diameter && (1-
823 pos2d(numparticles+jj,1))>=diameter) && (pos2d(numparticles+jj,2)>=diameter &&
824 (1-pos2d(numparticles+jj,2))>=diameter)
825             exchangemat(1,1,defectsite) = exchangemat(1,1,defectsite) + 1;
826
827         % Particle moved to a Site 3 grid space on current step
828         elseif (pos2d(numparticles+jj,1)<diameter &&
829 (pos2d(numparticles+jj,2)<(center(defectsite)+3*diameter/2) &&
830 pos2d(numparticles+jj,2)>(center(defectsite)-3*diameter/2)))
831             exchangemat(1,3,defectsite) = exchangemat(1,3,defectsite) + 1;
832
833         % Particle moved to a Site 2 grid space on current step
834         else
835             exchangemat(1,2,defectsite) = exchangemat(1,2,defectsite) + 1;
836         end
837
838
839         % Particle is found at a Site 2 grid space at previous time step
840         else
841
842         % Particle moved to a Site 1 grid space on current step
843         if (pos2d(numparticles+jj,1)>=diameter && (1-
844 pos2d(numparticles+jj,1))>=diameter) && (pos2d(numparticles+jj,2)>=diameter &&
845 (1-pos2d(numparticles+jj,2))>=diameter)
846             exchangemat(2,1,defectsite) = exchangemat(2,1,defectsite) + 1;
847
848         % Particle moved to a Site 3 grid space on current step
849         elseif (pos2d(numparticles+jj,1)<diameter &&
850 (pos2d(numparticles+jj,2)<(center(defectsite)+3*diameter/2) &&
851 pos2d(numparticles+jj,2)>(center(defectsite)-3*diameter/2)))
852             exchangemat(2,3,defectsite) = exchangemat(2,3,defectsite) + 1;
853
854         % Particle is still in a Site 2 grid space on current step
855         else
```

```
856         exchangemat(2,2,defectsite) = exchangemat(2,2,defectsite) + 1;
857     end
858 end
859 end
860
861 end
862
863 % Current time step is moved to previous time step for next iteration
864 pos2d(1:numparticles,:) = pos2d((numparticles+1):(2*numparticles),:);
865
866 end
867
868
869 % Heat map for the population density, normalized by the average
870 % population and centered about 0
871 figure
872 heatmap(population./mean(population,'all')-1)
873 colorbar
874
875 for ii = 1:7
876     asy(ii,1) = (exchangemat(1,2,ii)-
877 exchangemat(2,1,ii)).*100./sum(exchangemat(:, :, ii), 'all');
878     asy(ii,2) = (exchangemat(2,3,ii)-
879 exchangemat(3,2,ii)).*100./sum(exchangemat(:, :, ii), 'all');
880     asy(ii,3) = (exchangemat(1,3,ii)-
881 exchangemat(3,1,ii)).*100./sum(exchangemat(:, :, ii), 'all');
882     end
883
884 end
885
```
